# Supplementary material for: ALD-engineered amorphous NiO/crystalline CoFe-PBA heterointerface for high-performance seawater oxygen evolution
Source: Royal Society of Chemistry journal article supplement (doi:10.1039/d5qi01744k), 2025-11-26
Supplement: d5qi01744k1.pdf [file d5qi01744k1.pdf]

**Supplementary Information for ALD-Engineered Amorphous  
NiO/Crystalline CoFe-PBA Heterointerface for High-Performance  
Seawater Oxygen Evolution**

*Jie Tan <sup>a</sup>, Mingliang Guo <sup>b, \*</sup>, Hai Li <sup>a</sup>, Yongcheng Qi <sup>a</sup>, Mingyu Wang <sup>a</sup>, Xiaohong Wang <sup>a</sup>, Hualan Li <sup>c, \*</sup>, Lei Ding <sup>a, \*</sup>*

*<sup>a</sup> State Key Laboratory of Tropic Ocean Engineering Materials and Materials Evaluation, School of Materials Science and Engineering, Hainan University, Haikou 570228, China. E-mail: lding@hainanu.edu.cn*

*<sup>b</sup> School of Automotive Materials, Hubei University of Automotive Technology, Shiyan 442002, China. E-mail: guomingliang02@163.com*

*<sup>c</sup> School of Chemistry and Materials Engineering, Mianyang Teachers' College, Mianyang 621000, China. E-mail: scmyli789@aliyun.com*

## Experimental Section

**Materials:** Trisodium citrate dihydrate ( $\text{C}_6\text{H}_5\text{Na}_3\text{O}_7 \cdot 2\text{H}_2\text{O}$ , AR) was purchased from Xilong Scientific Co., Ltd. Potassium ferricyanide ( $\text{K}_3\text{Fe}(\text{CN})_6$ ,  $\geq 99.5\%$ ), Iron(III) nitrate nonahydrate ( $\text{Fe}(\text{NO}_3)_3 \cdot 9\text{H}_2\text{O}$ , 98.5%), Cobalt nitrate hexahydrate ( $\text{Co}(\text{NO}_3)_2 \cdot 6\text{H}_2\text{O}$ , 99%) and Bis(cyclopentadienyl)nickel(II) ( $\text{Ni}(\text{C}_5\text{H}_5)_2$ , 98%) were purchased from Macklin. The nickel foam (NF) used as a substrate was obtained from Suzhou Sinero Technology Co., Ltd.

**Preparation of CoFe-PBA/NF:** Firstly,  $\text{Na}_3\text{C}_6\text{H}_5\text{O}_7 \cdot 2\text{H}_2\text{O}$  (1.125 mmol),  $\text{K}_3\text{Fe}(\text{CN})_6$  (1 mmol),  $\text{Fe}(\text{NO}_3)_3 \cdot 9\text{H}_2\text{O}$  (0.5 mmol) and  $\text{Co}(\text{NO}_3)_2 \cdot 6\text{H}_2\text{O}$  (0.5 mmol) were dissolved in deionized water (50 mL) and stirred continuously for 5 h. Then, the product was collected by centrifugation, washed repeatedly with ethanol and dried. Finally, 5 mg of CoFe-PBA was dispersed in ethanol (1 mL), sonicated for 1 h, and then 500  $\mu\text{L}$  of the slurry was dropped on both sides of the nickel foam ( $1\text{ cm} \times 1.5\text{ cm}$ ).

**Preparation of NiO/CoFe-PBA/NF and NiO/NF:**  $\text{Ni}(\text{C}_5\text{H}_5)_2$  and  $\text{H}_2\text{O}$  as precursors. NiO was deposited on the surface of CoFe-PBA/NF by ALD system (**Fig. S1**) to form NiO/CoFe-PBA/NF catalyst. The ALD process was conducted at a deposition temperature of  $200\text{ }^\circ\text{C}$  for 50 cycles. The parameters for the ALD system are as follows: Valve A: 10000 ms, Valve B: 10000 ms, Valve C: 10000 ms, Valve D: 2000 ms. The related reaction of the ALD process is as follows:  $\text{C}_5\text{H}_5\text{-Ni-C}_5\text{H}_5 + \text{H}_2\text{O} \rightarrow \text{NiO} + \text{C}_5\text{H}_6 + \text{C}_5\text{H}_6$ . The precursor was purged into the deposition chamber with inert gases (argon and nitrogen), and  $\text{Ni}(\text{C}_5\text{H}_5)_2$  reacted with water to form an atomic film. The preparation process of NiO/NF is similar, except that CoFe-PBA/NF is replaced with NF.

**Characterization:** The XRD results were achieved using a LabX XRD-6100 X-ray diffractometer with Cu K $\alpha$  radiation (40 kV, 30 mA). The Raman spectra were collected on Horiba Labram HR800 Evolution spectrometer with a 532 nm excitation laser. X-ray photoelectron spectroscopy (XPS) was performed on a Kratos Amicus X-ray photoelectron spectrometer. The scanning electron microscopy (SEM) results were collected by an SU8010 at an accelerating voltage of 5.0 kV. Transmission electron microscopy (TEM) images were collected using JEM2100F installation. The elemental mapping of the samples was performed using an energy-dispersive X-ray spectroscopy accessory attached to the TEM.

**Electrochemical measurements:** Electrochemical analysis was performed using a Bio-Logical VMP-300 electrochemical workstation with a standard three-electrode configuration. The NiO/NF, CoFe-PBA/NF, and NiO/CoFe-PBA/NF catalysts were used as the working electrodes, with a graphite rod counter electrode and a reference electrode (Hg/HgO). The electrolyte was a 1.0 M KOH solution and 1.0 M KOH with seawater. The seawater was sourced from the Baishamen sea area, Hainan Province, China. The linear sweep voltammetry (LSV) for OER was measured at the scan rate of 5 mV s<sup>-1</sup> with the iR compensation (85%). The measured potential was normalized by the reversible hydrogen electrode (RHE) according to the equation:  $E_{\text{RHE}} = E_{\text{Hg/HgO}} + 0.098 \text{ V} + 0.059 \text{ pH}$ . The electrochemical impedance spectra (EIS) were measured from 0.01 Hz to 100 kHz at 1.524 V vs. RHE for OER. The electrochemical active surface area (ECSA) was tested in the non-Faraday region. Chronopotentiometry was used to measure the long-term stability of OER.

**Computational details:** All the calculations are performed in the framework of the density functional theory with the projector augmented plane-wave method, as implemented in the Vienna ab initio simulation package.<sup>1</sup> We used the generalized gradient approximation (GGA) with the Pedrew-Burke-Ernzerhof (PBE) function and Hubbard U corrections (4.30, 3.52, 3.80 eV for treating Fe, Co and Ni 3d orbitals) were introduced to consider the self-interaction error of transition metals.<sup>2,3</sup> The cut-off energy for plane wave is set to 500 eV. The energy criterion is set to  $10^{-5}$  eV in iterative solution of the Kohn-Sham equation. The vacuum layer of 15 Å is added perpendicular to the sheet to avoid artificial interaction between periodic images. The Brillouin zone integration is performed using a 2x2x1 k-mesh. All the structures are relaxed until the residual forces on the atoms have declined to less than 0.01 eV/Å.

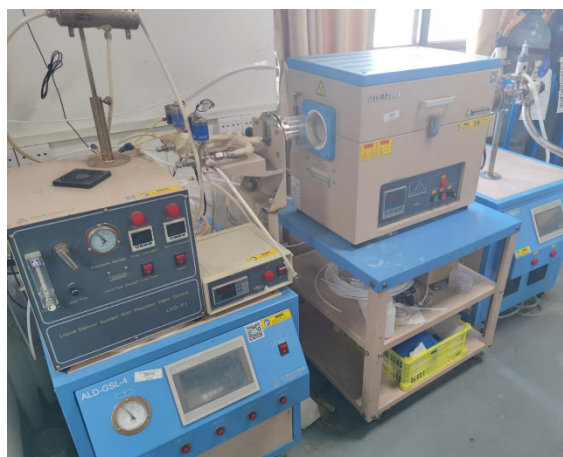

**Fig. S1.** Digital photograph of ALD-GSL-4.

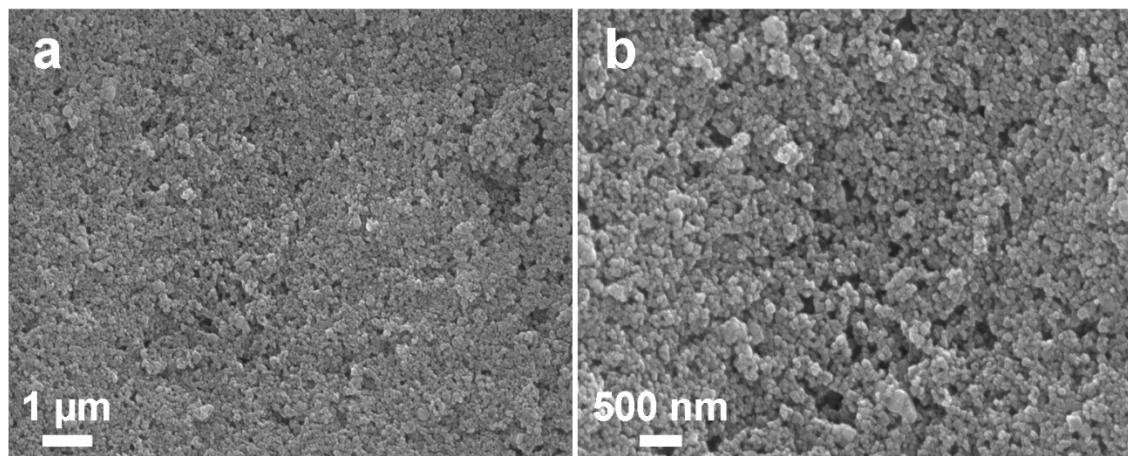

**Fig. S2.** SEM images of CoFe-PBA/NF.

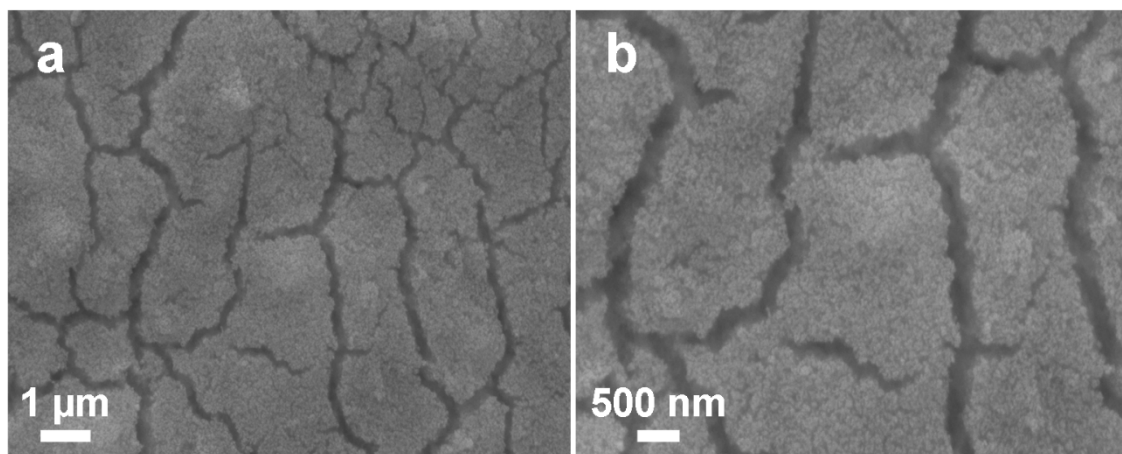

**Fig. S3.** SEM images of NiO/CoFe-PBA/NF.

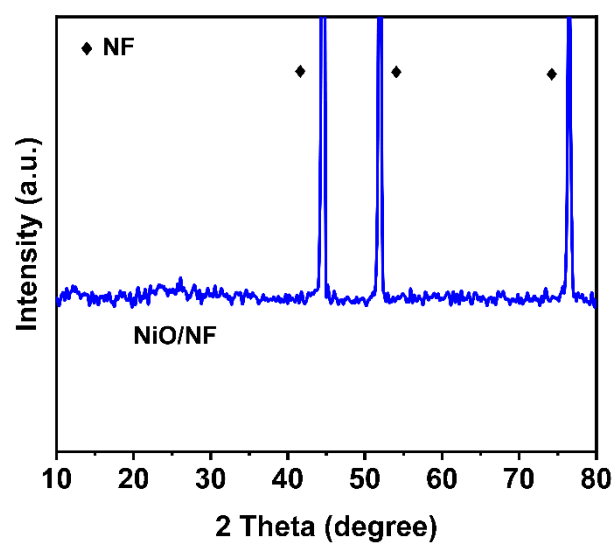

**Fig. S4.** XRD pattern of NiO/NF.



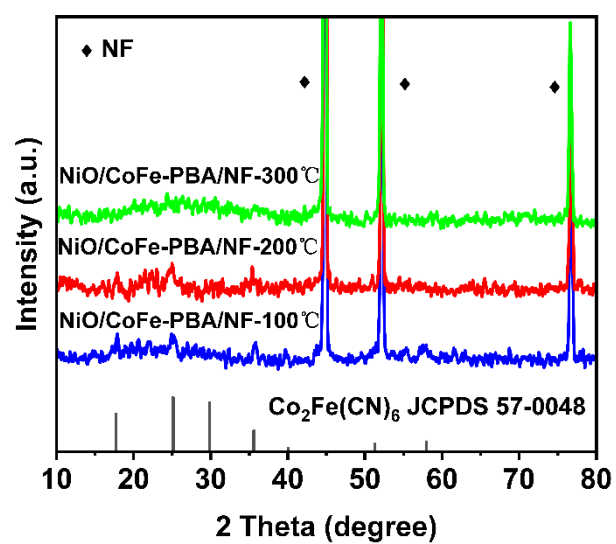

Fig. S5. XRD patterns of NiO/CoFe-PBA/NF at various temperatures.

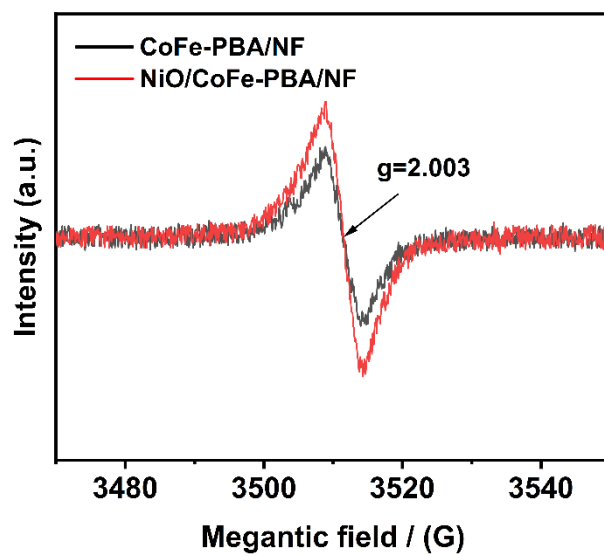

**Fig. S6.** EPR spectra of CoFe-PBA/NF and NiO/CoFe-PBA/NF.

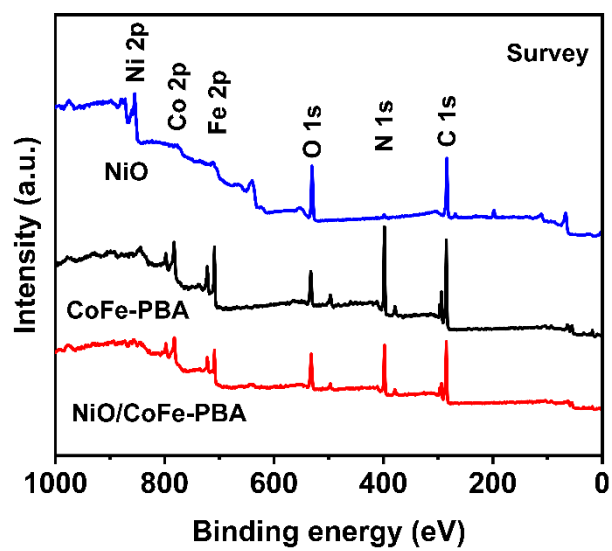

**Fig. S7.** XPS survey spectra of NiO/NF, CoFe-PBA/NF, and NiO/CoFe-PBA/NF.

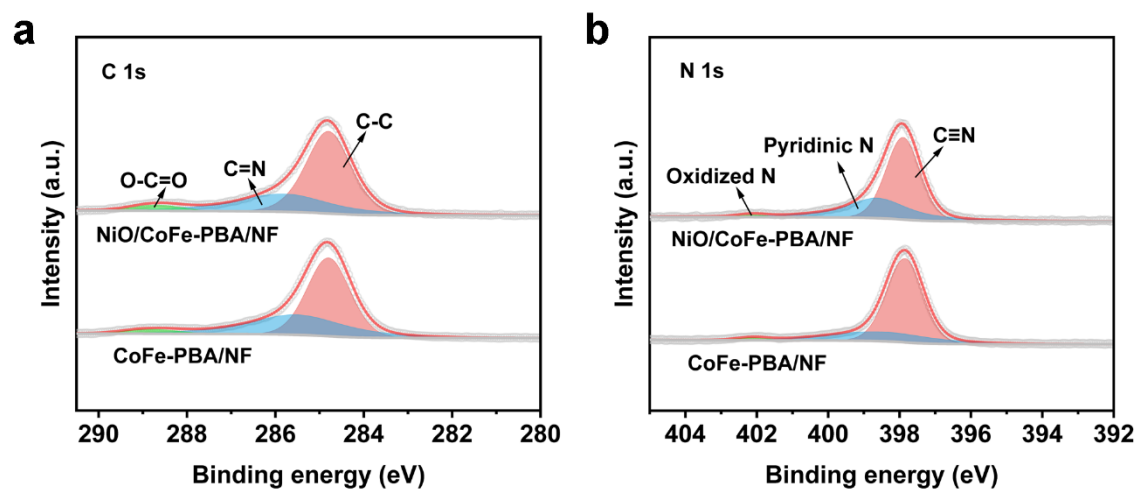

**Fig. S8.** High-resolution XPS spectra of NiO/NF, CoFe-PBA/NF, and NiO/CoFe-PBA/NF. a) C 1s, and b) N 1s.

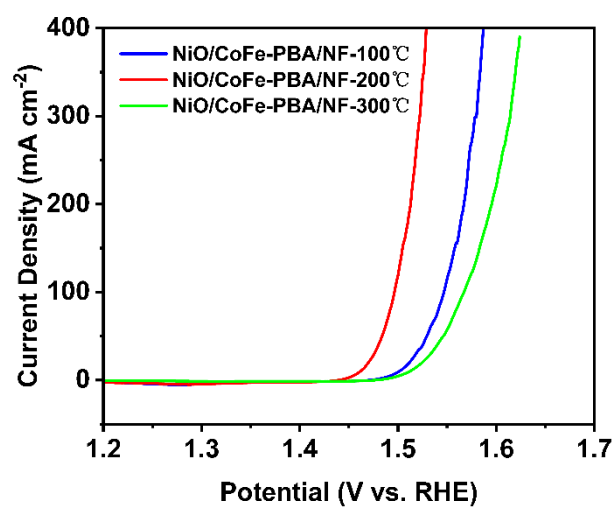

**Fig. S9.** LSV curves for samples with various temperatures in 1.0 M KOH.

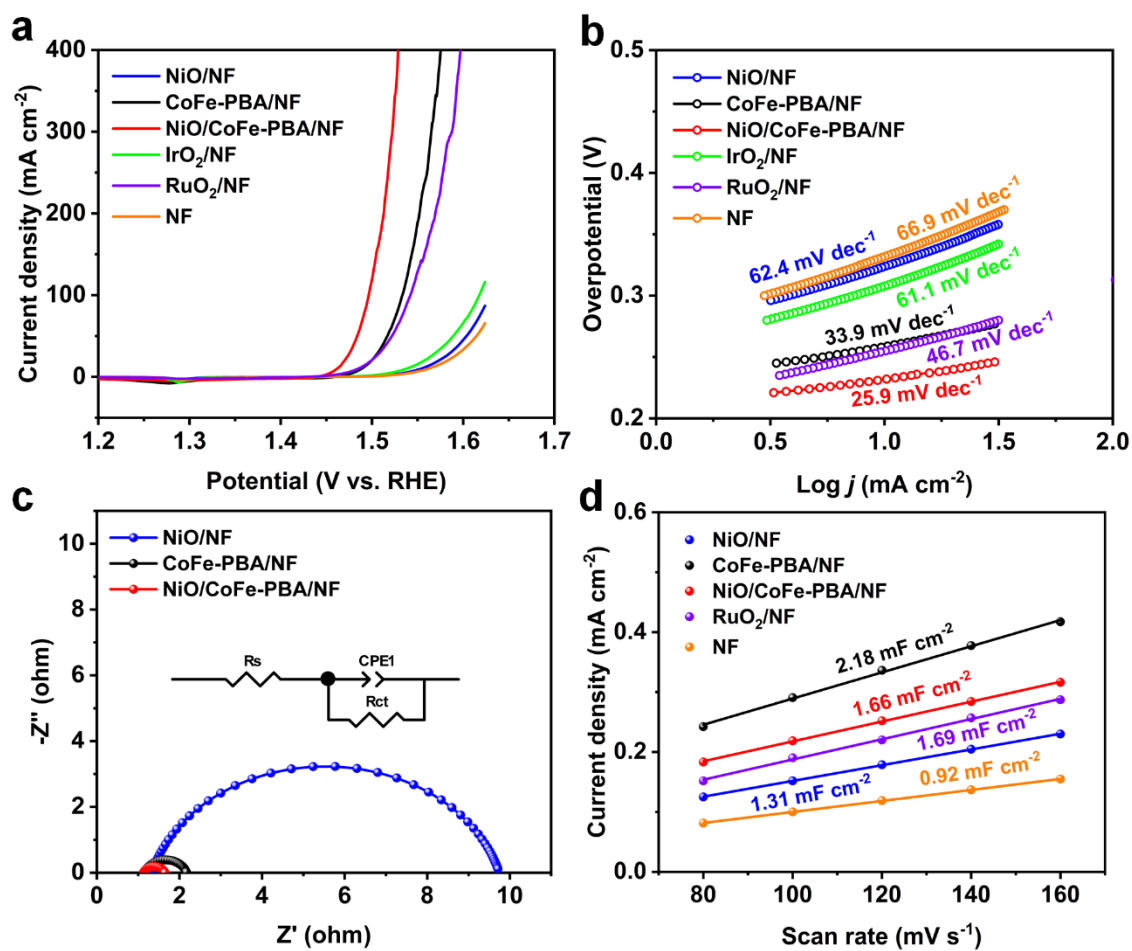

**Fig. S10.** OER performance in 1.0 M KOH solution. a) LSV curves, and b) the corresponding Tafel plots; c) EIS; d)  $C_{dl}$  values.

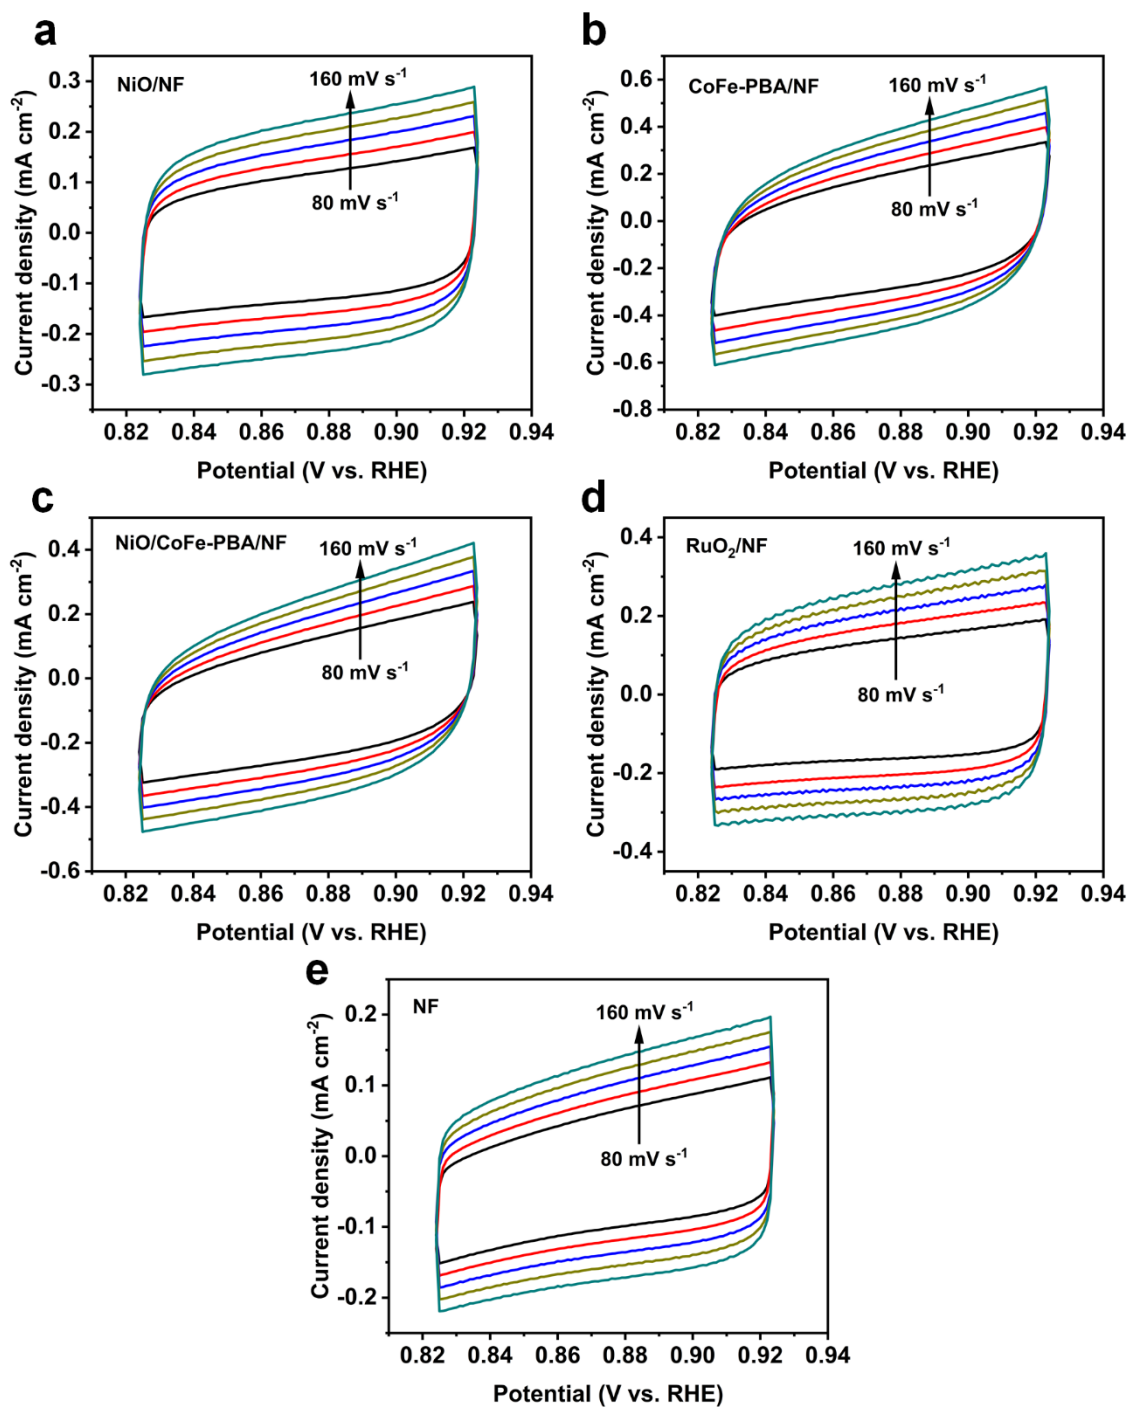

**Fig. S11.** Cyclic voltammograms at various scan rates of 80, 100, 120, 140 and 160 mV s<sup>-1</sup> for a) NiO/NF, b) CoFe-PBA/NF, c) NiO/CoFe-PBA/NF, d) RuO<sub>2</sub>/NF, and e) NF in 1.0 M KOH solution.

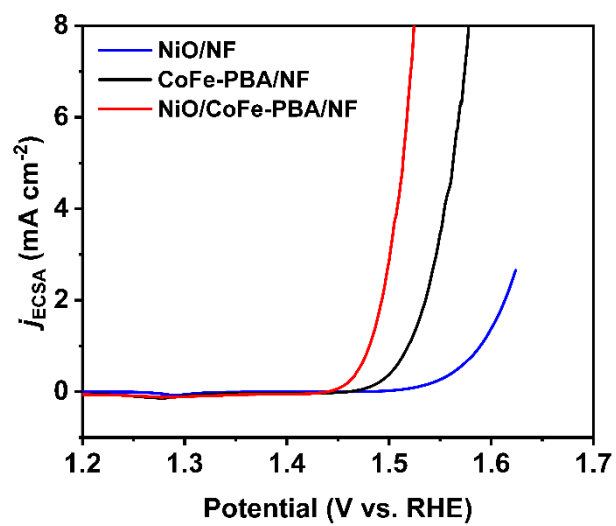

**Fig. S12.** ECSA-normalized LSV curves in 1.0 M KOH solution.



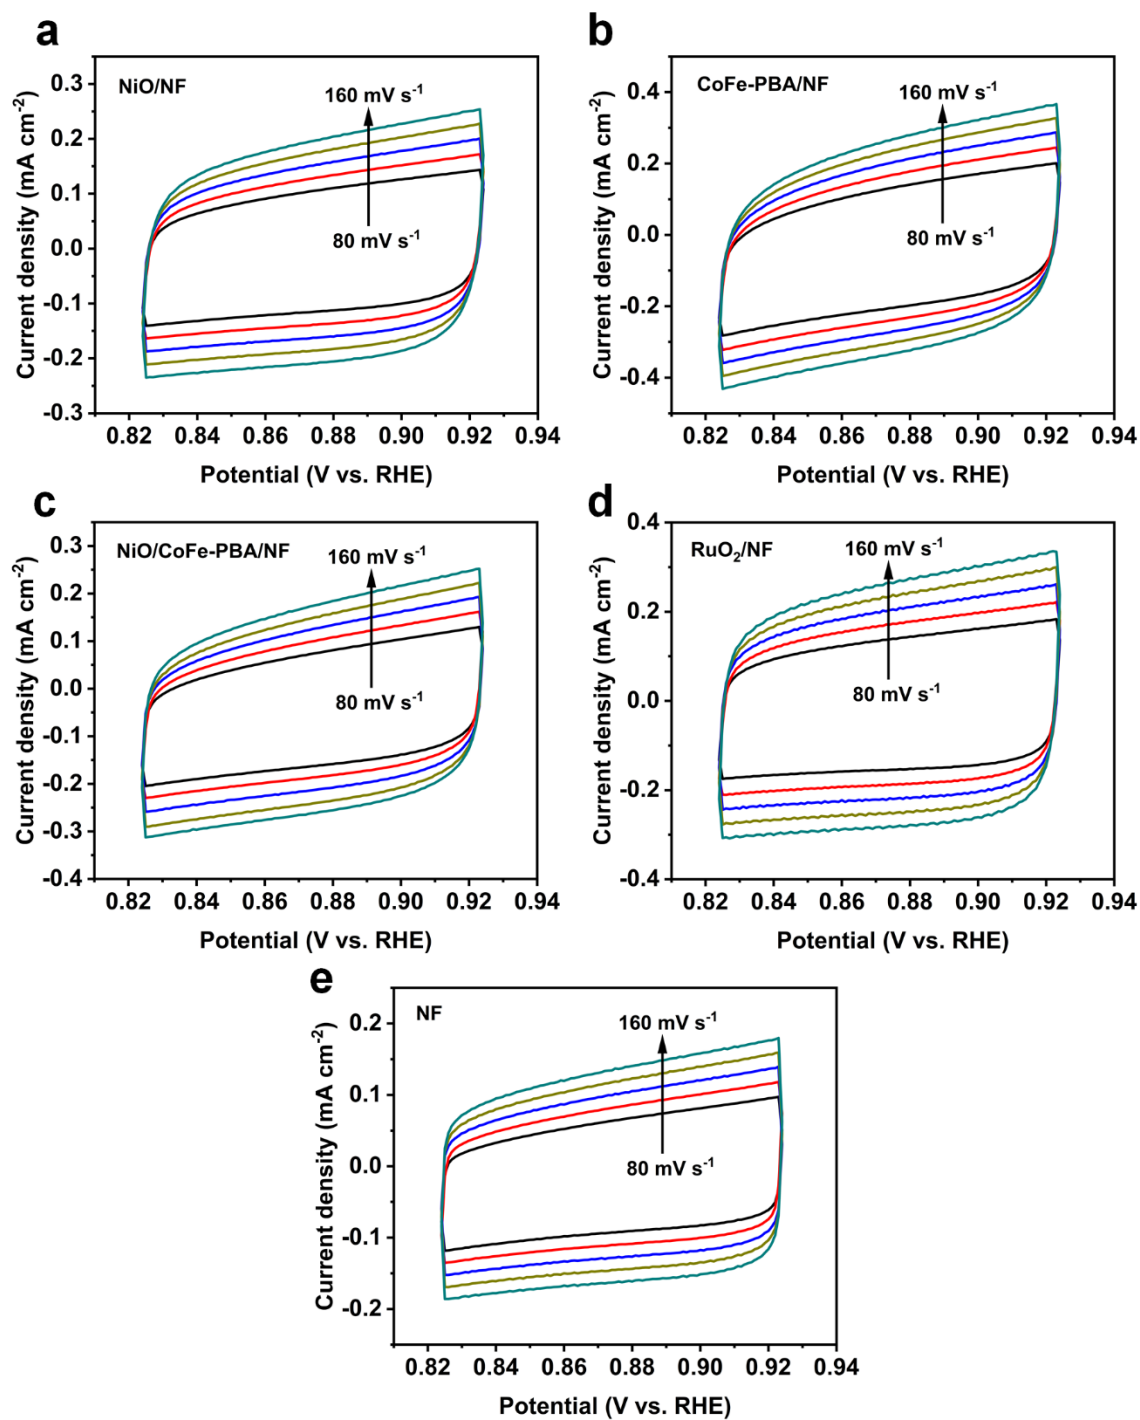

**Fig. S13.** Cyclic voltammograms at various scan rates of 80, 100, 120, 140 and 160 mV s<sup>-1</sup> for a) NiO/NF, b) CoFe-PBA/NF, c) NiO/CoFe-PBA/NF, d) RuO<sub>2</sub>/NF, and e) NF in 1.0 M KOH with seawater solution.

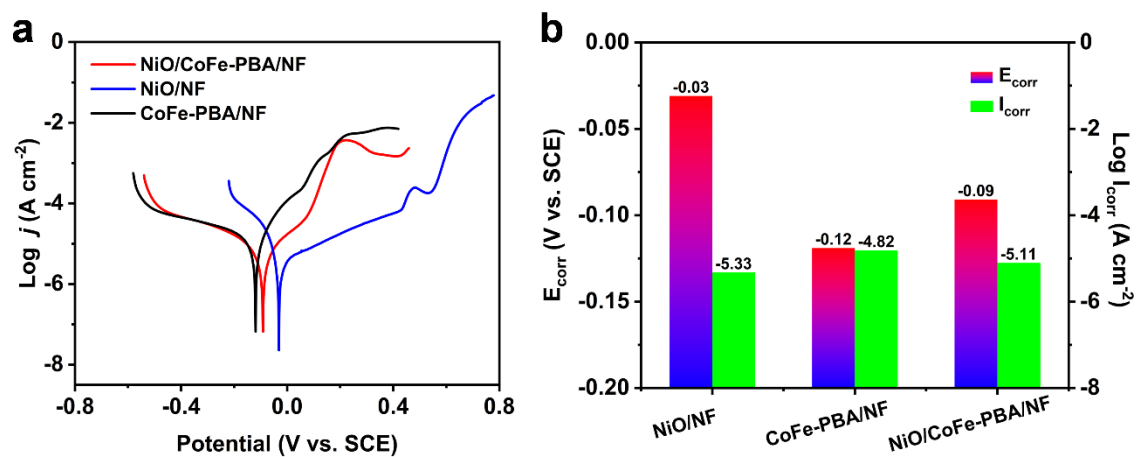

**Fig. S14.** a) Corrosion polarization curve, and b) the corresponding corrosion potential ( $E_{corr}$ ) and corrosion current density ( $I_{corr}$ ).

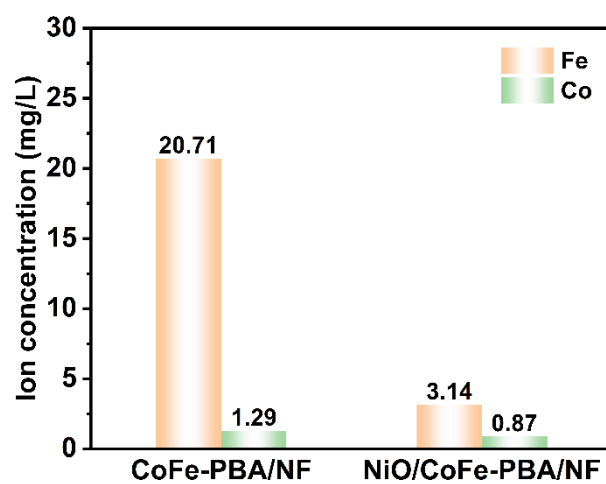

**Fig. S15.** Ion concentration of Fe and Co in 1.0 M KOH with seawater solution after stability test.

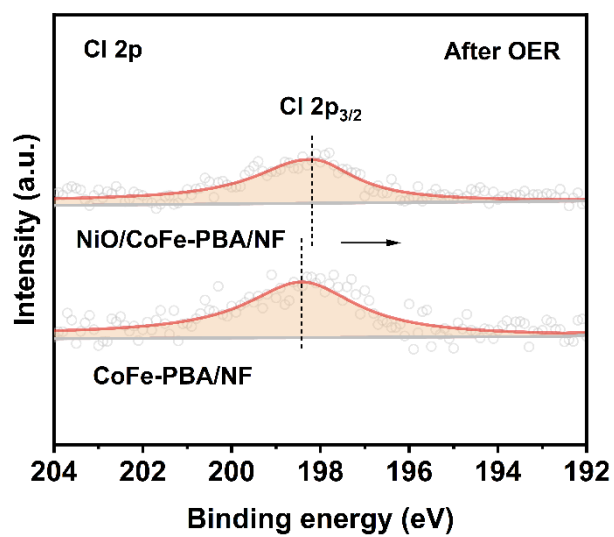

**Fig. S16.** High-resolution XPS spectra of Cl 2p for CoFe/PBA/NF and NiO/CoFe-PBA/NF after OER test.

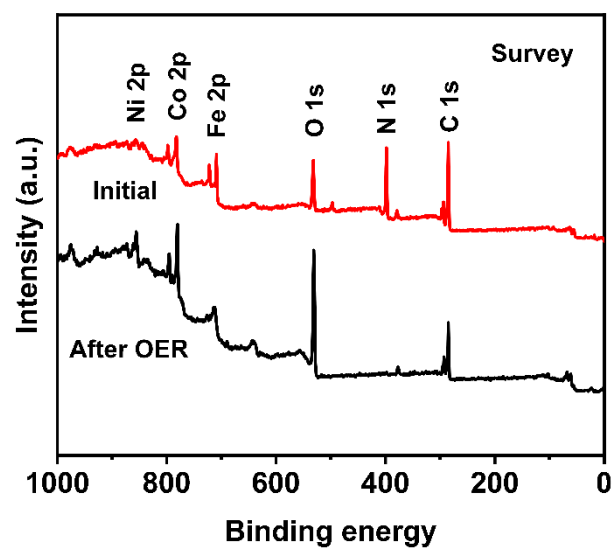

**Fig. S17.** XPS survey spectra of NiO/CoFe-PBA/NF after OER test.

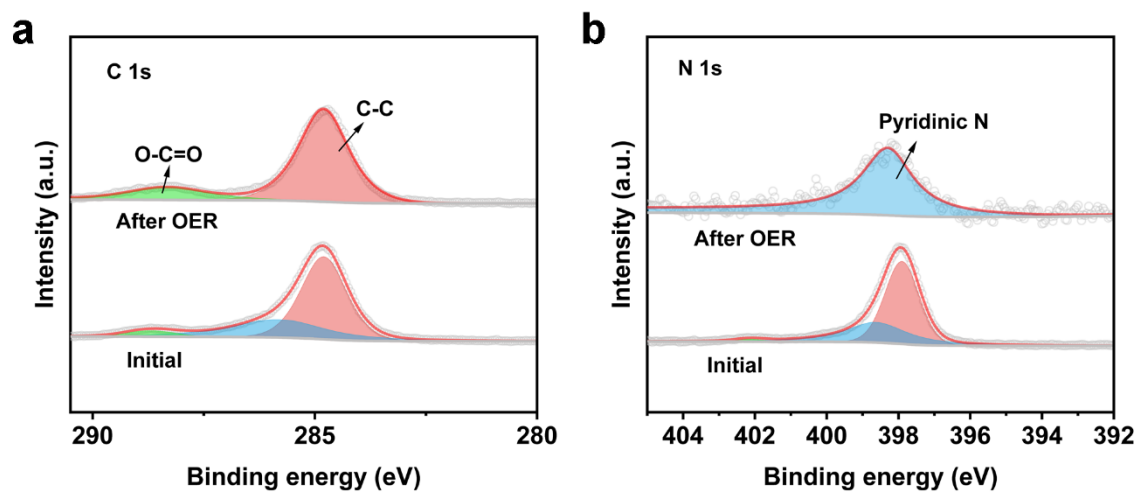

**Fig. S18.** High-resolution XPS spectra of NiO/CoFe-PBA/NF after OER test. a) C 1s, and b) N 1s.

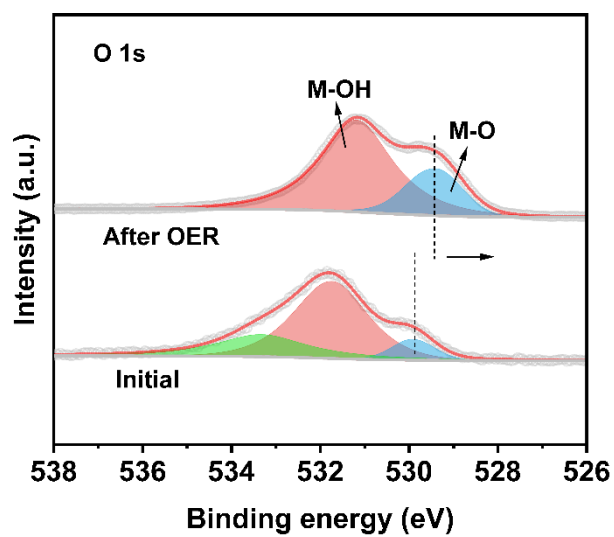

**Fig. S19.** High-resolution XPS spectra of O 1s for NiO/CoFe-PBA/NF after OER test.

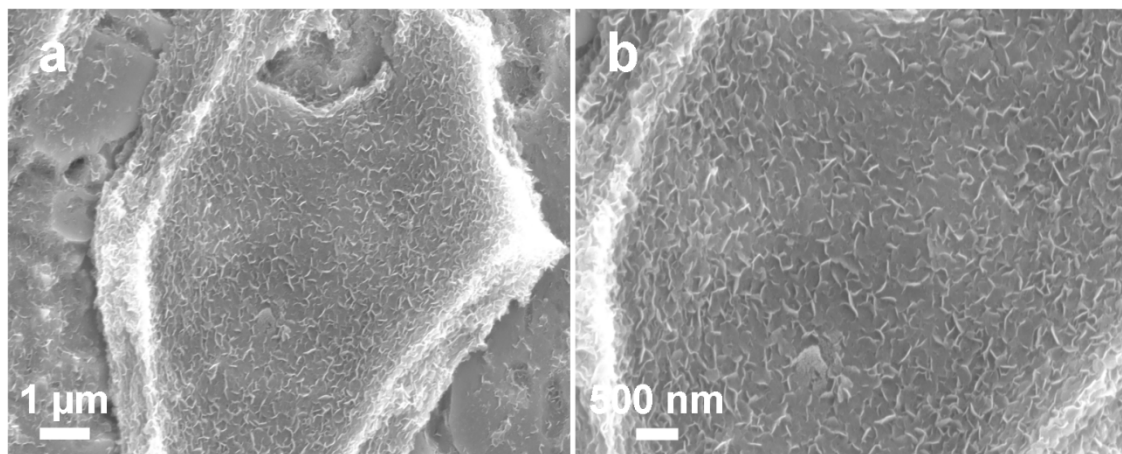

**Fig. S20.** SEM images of NiO/CoFe-PBA/NF after OER test.



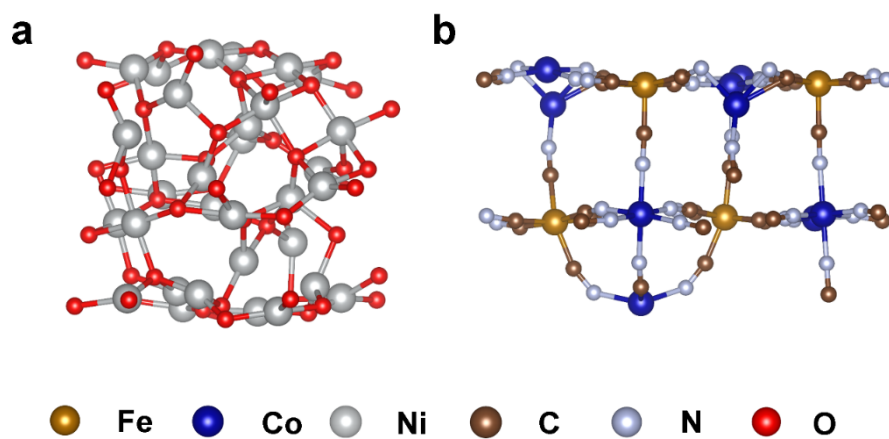

**Fig. S21.** The structural feature of a) NiO and b) CoFe-PBA.

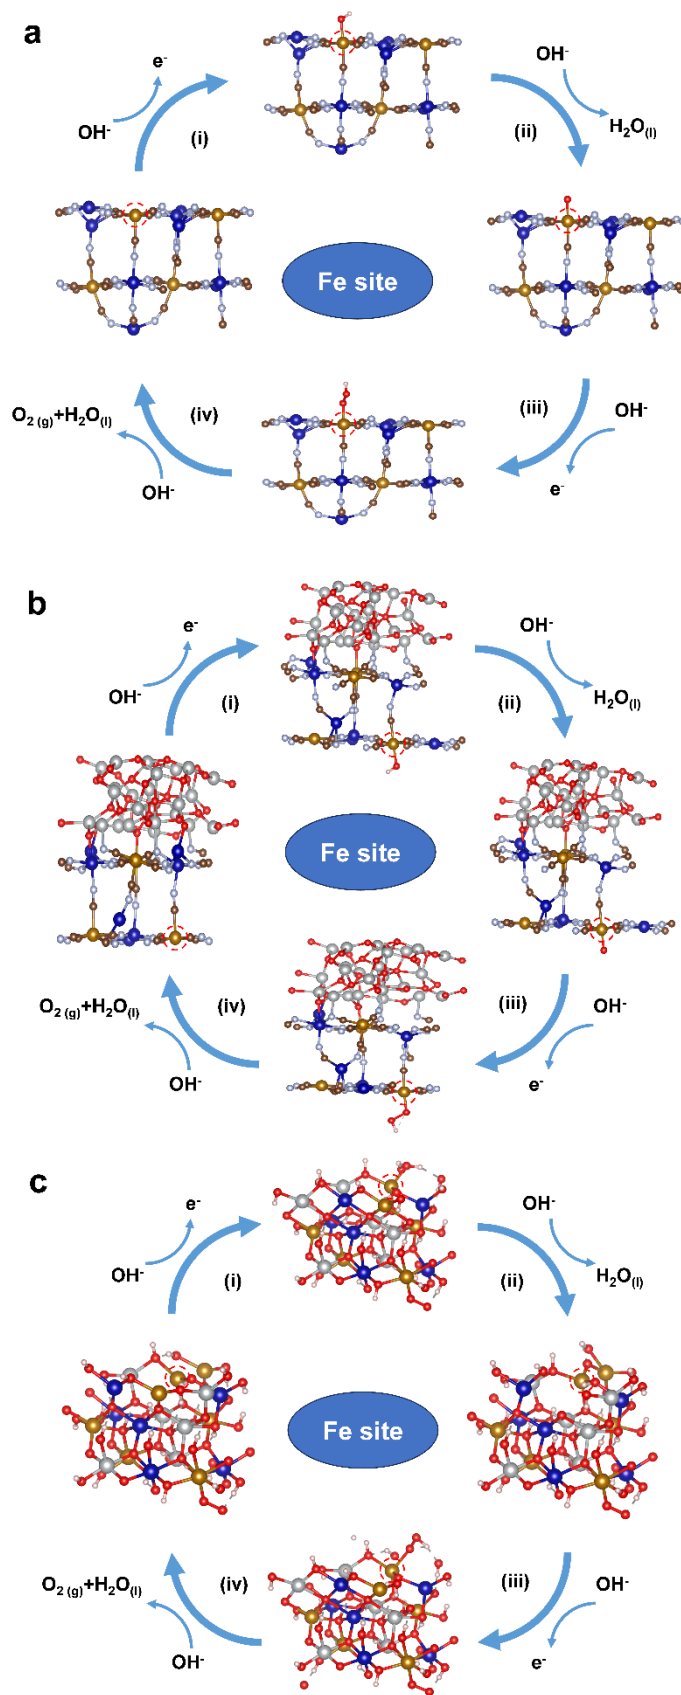

**Fig. S22.** Four-electron mechanism of OER on the Fe sites in a) CoFe-PBA, b) NiO/CoFe-PBA and c) FeCoNiOOH.

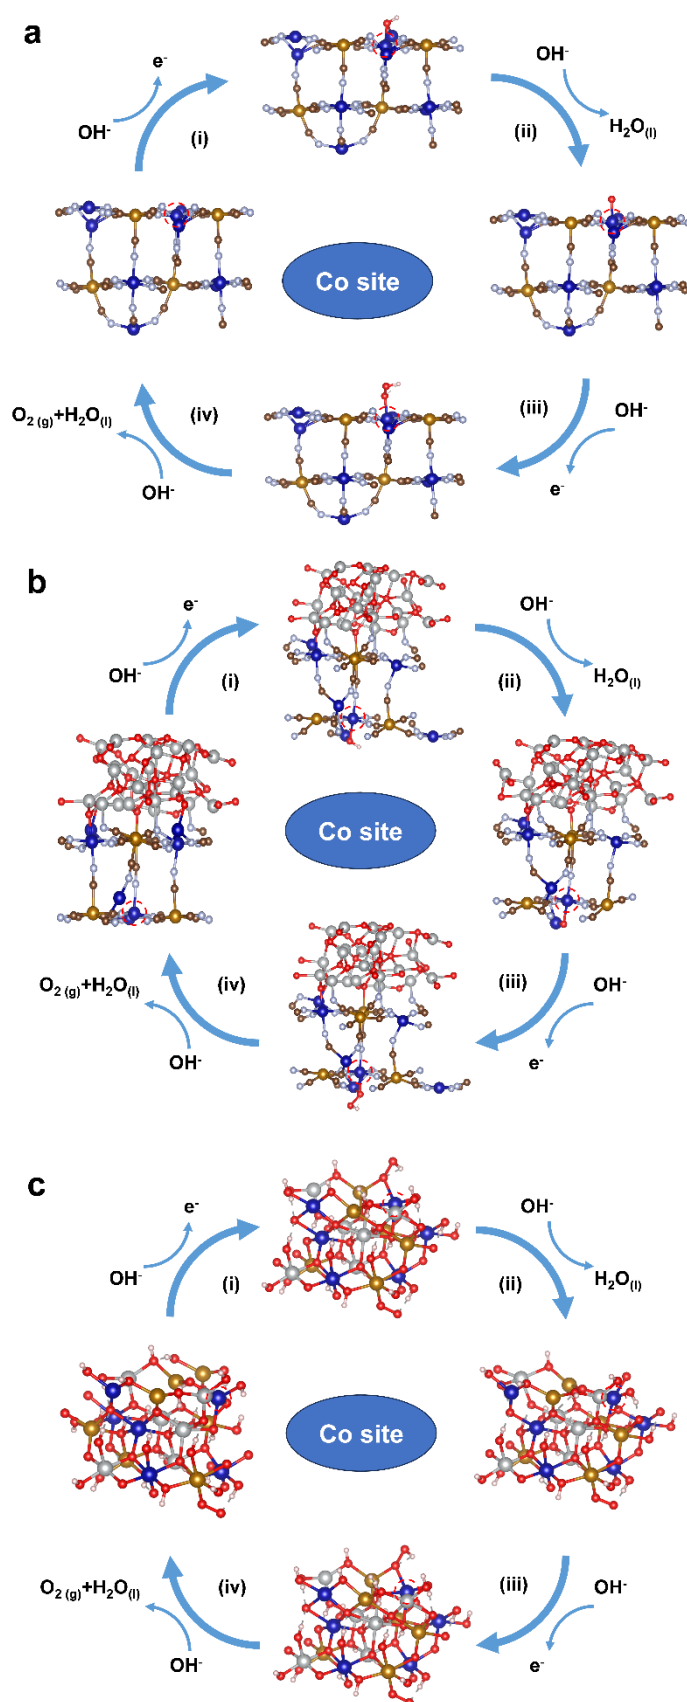

**Fig. S23.** Four-electron mechanism of OER on the Co sites in a) CoFe-PBA, b) NiO/CoFe-PBA and c) FeCoNiOOH.

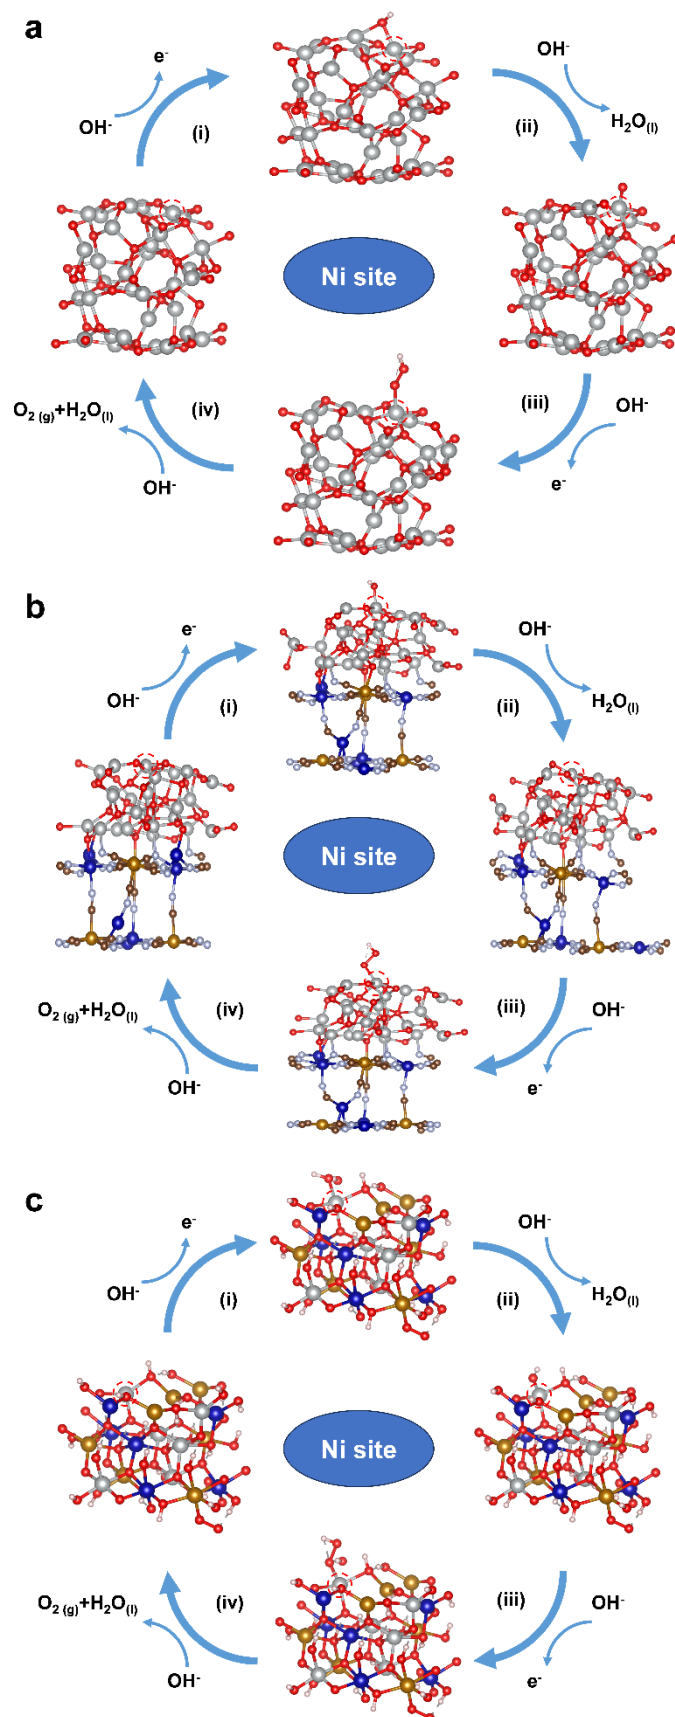

**Fig. S24.** Four-electron mechanism of OER on the Ni sites in a) NiO, b) NiO/CoFe-PBA and c) FeCoNiOOH.

**Table S1.** EIS calculation parameters of NiO/NF, CoFe-PBA/NF, and NiO/CoFe-PBA/NF for OER in 1 M KOH solution.

| Sample             | NiO/NF | CoFe-PBA/NF | NiO/CoFe-PBA/NF |
|--------------------|--------|-------------|-----------------|
| $R_s (\Omega)$     | 1.329  | 1.162       | 1.129           |
| $R_{ct} (\Omega)$  | 8.413  | 1.007       | 0.5194          |
| CPE-T ( $\Omega$ ) | 0.0173 | 0.2196      | 0.2351          |
| CPE-P ( $\Omega$ ) | 0.8348 | 0.8336      | 0.7799          |

**Table S2.** EIS calculation parameters of NiO/NF, CoFe-PBA/NF, and NiO/CoFe-PBA/NF for OER in 1 M KOH with seawater solution.

| Sample             | NiO/NF | CoFe-PBA/NF | NiO/CoFe-PBA/NF |
|--------------------|--------|-------------|-----------------|
| $R_s (\Omega)$     | 1.876  | 1.169       | 1.212           |
| $R_{ct} (\Omega)$  | 26.42  | 3.756       | 1.019           |
| CPE-T ( $\Omega$ ) | 0.0171 | 0.2847      | 0.2099          |
| CPE-P ( $\Omega$ ) | 0.8059 | 0.7751      | 0.7862          |

**Table S3.** Comparison of the OER performance in 1.0 M KOH with seawater for different electrocatalysts.

| Catalysts                                          | Overpotential<br>@100 mA cm <sup>-2</sup> | electrolyte          | iR Compensation (%) | Ref.      |
|----------------------------------------------------|-------------------------------------------|----------------------|---------------------|-----------|
| NiO/CoFe-PBA/NF                                    | 301 mV                                    | 1.0 M KOH + Seawater | 85                  | This work |
| NiFe-LDH/MOF                                       | 307 mV                                    | 1.0 M KOH + Seawater | 100                 | 4         |
| FeOOH-(CrCo)O <sub>x</sub> /PCF                    | 306 mV                                    | 1.0 M KOH + Seawater | 90                  | 5         |
| Mo-Ni <sub>3</sub> S <sub>2</sub> /VO <sub>2</sub> | 316 mV                                    | 1.0 M KOH + Seawater | 85                  | 6         |
| NiMoS@NSC/NF                                       | 318 mV                                    | 1.0 M KOH + Seawater | 90                  | 7         |
| Ni/Co(OH) <sub>2</sub> -Ru@NF                      | 324 mV                                    | 1.0 M KOH + Seawater | 80                  | 8         |
| NiFe-MOF@Ni <sub>2</sub> P/Ni(OH) <sub>2</sub>     | 302 mV                                    | 1.0 M KOH + Seawater | 85                  | 9         |
| Ni <sub>3</sub> S <sub>2</sub> @NiFe-TDC-60        | 380 mV                                    | 1.0 M KOH + Seawater | without             | 10        |
| S-NiMoO <sub>4</sub> @NiFe-LDH                     | 315 mV                                    | 1.0 M KOH + Seawater | 90                  | 11        |
| NiCoHPi@Ni <sub>3</sub> N/NF                       | 365 mV                                    | 1.0 M KOH + Seawater | 85                  | 12        |
| NiFeP/Ni <sub>3</sub> S <sub>2</sub>               | 406 mV                                    | 1.0 M KOH + Seawater | 85                  | 13        |

**Table S4.** The Gibbs free energy diagram of the possible four steps of the OER process on the Fe site of CoFe-PBA, NiO/CoFe-PBA and FeCoNiOOH.

| Sample                     | CoFe-PBA | NiO/CoFe-PBA | FeCoNiOOH |
|----------------------------|----------|--------------|-----------|
| $* \rightarrow *OH$        | 0.71 eV  | 0.39 eV      | 0.44 eV   |
| $*OH \rightarrow *O$       | 1.25 eV  | 1.49 eV      | 1.22 eV   |
| $*O \rightarrow *OOH$      | 1.98 eV  | 1.70 eV      | 1.68 eV   |
| $*OOH \rightarrow * + O_2$ | 0.98 eV  | 1.34 eV      | 1.57 eV   |



**Table S5.** The Gibbs free energy diagram of the possible four steps of the OER process on the Co site of CoFe-PBA, NiO/CoFe-PBA and FeCoNiOOH.

| Sample                     | CoFe-PBA | NiO/CoFe-PBA | FeCoNiOOH |
|----------------------------|----------|--------------|-----------|
| $* \rightarrow *OH$        | 0.47 eV  | 0.53 eV      | 0.91 eV   |
| $*OH \rightarrow *O$       | 2.25 eV  | 1.49 eV      | 1.23 eV   |
| $*O \rightarrow *OOH$      | 0.92 eV  | 2.03 eV      | 1.88 eV   |
| $*OOH \rightarrow * + O_2$ | 1.27 eV  | 0.87 eV      | 0.89 eV   |

**Table S6.** The Gibbs free energy diagram of the possible four steps of the OER process on the Ni site of CoFe-PBA, NiO/CoFe-PBA and FeCoNiOOH.

| Sample                     | NiO     | NiO/CoFe-PBA | FeCoNiOOH |
|----------------------------|---------|--------------|-----------|
| $* \rightarrow *OH$        | 1.41 eV | 1.06 eV      | 0.50 eV   |
| $*OH \rightarrow *O$       | 1.92 eV | 0.29 eV      | 1.62 eV   |
| $*O \rightarrow *OOH$      | 1.45 eV | 1.81 eV      | 1.50 eV   |
| $*OOH \rightarrow * + O_2$ | 0.14 eV | 1.76 eV      | 1.31 eV   |

## References

1. G. Kresse and D. Joubert, From ultrasoft pseudopotentials to the projector augmented-wave method, *Phys. Rev. B*, 1999, **59**, 1758-1775.
2. J. P. Perdew, K. Burke and M. Ernzerhof, Generalized Gradient Approximation Made Simple, *Phys. Rev. Lett.*, 1996, **77**, 3865-3868.
3. C. Yue, L. Wang, H. Wang, J. Du, M. Lei and M. Pu, First-Principles Study on the Electrocatalytic Oxygen Evolution Reaction on the (110) Surfaces of Layered Double Hydroxides, *J. Phys. Chem. C*, 2022, **126**, 18351-18365.
4. M. Xiao, C. Wu, J. Zhu, C. Zhang, Y. Li, J. Lyu, W. Zeng, H. Li, L. Chen and S. Mu, In situ generated layered NiFe-LDH/MOF heterostructure nanosheet arrays with abundant defects for efficient alkaline and seawater oxidation, *Nano Res.*, 2023, **16**, 8945-8952.
5. R. Liu, G. Chen, Y. Guo, T. Li, J. Qiu, B. He and P. Tang, Designing persimmon-like FeOOH-(CrCo)O<sub>x</sub> on the plasma-treated cobalt foam for a highly efficient oxygen evolution in an alkaline-seawater electrolyte, *Chem. Eng. J.*, 2024, **500**, 157098.
6. H. T. Dao, S. Sidra, V. H. Hoa, Q. H. Nguyen, M. Mai, P. K. L. Tran and D. H. Kim, In situ growth and interfacial reconstruction of Mo-doped Ni<sub>3</sub>S<sub>2</sub>/VO<sub>2</sub> as anti-corrosion electrocatalyst for long-term durable seawater splitting, *Appl. Catal., B*, 2025, **365**, 124925.
7. Y. He, Y. Hu, Z. Zhu, J. Li, Y. Huang, S. Zhang, M. S. Balogun and Y. Tong, High-performance multidimensional-structured N-doped nickel modulated Mo<sub>2</sub>N/FeO<sub>x</sub>N<sub>y</sub> bifunctional electrocatalysts for efficient alkaline seawater splitting, *Chem. Eng. J.*, 2024, **489**, 151348.
8. Q. Wang, Y. Du, Y. Gong, W. Xiao, H. Li, Y. Du, G. Xu, Z. Wu and L. Wang, Phosphorous and cations boost the electrocatalytic performances of Cu-based compounds for hydrogen/oxygen evolution reactions and overall water-splitting, *Chem. Eng. J.*, 2024, **489**, 151322.
9. J. Liu, J. Yang, Y. Song, J. Sun, Y. Tian, Q. Chen, X. Zhang and L. Zhang, Introducing non-bridging ligand in metal-organic framework-based electrocatalyst enabling reinforced oxygen evolution in seawater, *J. Colloid Interface Sci.*, 2023, **643**, 17-25.
10. G. Zuo, Z. Li, C. Wang, L. Guo and Y. Wang, Mildly sulfurized metal-organic frameworks-derived nickel sulfide heterostructures as bifunctional catalysts for efficient water/seawater electrolysis, *J. Colloid Interface Sci.*, 2025, **700**, 138647.
11. H. Wang, L. Chen, L. Tan, X. Liu, Y. Wen, W. Hou and T. Zhan, Electrodeposition of NiFe-layered double hydroxide layer on sulfur-modified nickel molybdate nanorods for highly efficient seawater splitting, *J. Colloid Interface Sci.*, 2022, **613**, 349-358.
12. H. Sun, J. Sun, Y. Song, Y. Zhang, Y. Qiu, M. Sun, X. Tian, C. Li, Z. Lv and L. Zhang, Nickel-Cobalt Hydrogen Phosphate on Nickel Nitride Supported on Nickel Foam for Alkaline Seawater Electrolysis, *ACS Appl. Mater. Interfaces*, 2022, **14**, 22061-22070.
13. Y. Song, X. Zhang, Z. Xiao, Y. Wang, P. Yi, M. Huang and L. Zhang, Coupled amorphous NiFeP/crystalline Ni<sub>3</sub>S<sub>2</sub> nanosheets enables accelerated reaction kinetics for high current density seawater electrolysis, *Appl. Catal., B*, 2024, **352**, 124028.
